# Supplementary material
Source: PubMed Central journal article supplement (PMC6193548)
Supplement: NIHMS79902-supplement-Supp_Figures_and_Table.pdf [file NIHMS79902-supplement-Supp_Figures_and_Table.pdf]

# Supplementary figure 1

**(A) METABRIC Breast Cancer Cohort**  
FR $\alpha$  copy number

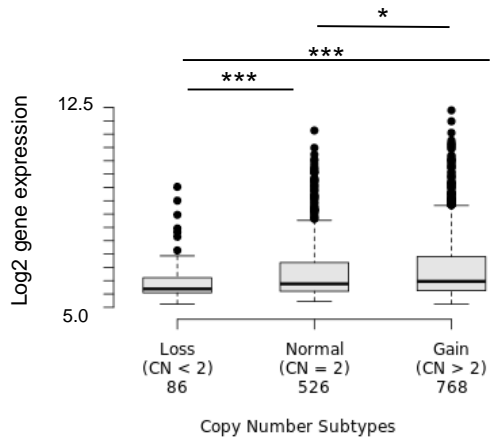

**(B) Lehman- Pietenpol TNBC subtype**

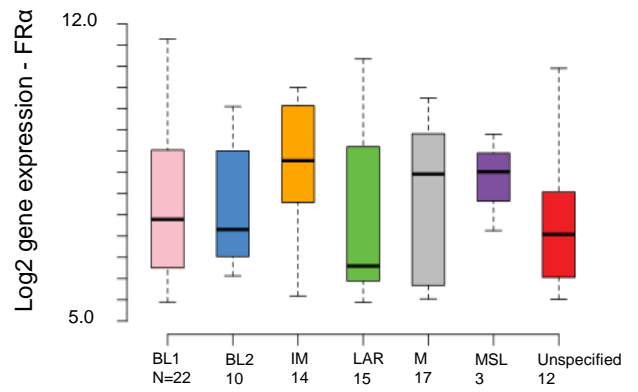

# Supplementary figure 2

## (A) Breast cancer histopathological subtype

| Cell line  | Breast cancer histopathological subtype | Cell line | Breast cancer histopathological subtype |
|------------|-----------------------------------------|-----------|-----------------------------------------|
| HCC1937    | TNBC                                    | HCC3153   | TNBC                                    |
| HS578T     | TNBC                                    | HCC38     | TNBC                                    |
| HCC1428    | TNBC                                    | HCC1187   | TNBC                                    |
| HCC70      | TNBC                                    | HCC1395   | TNBC                                    |
| BT549      | TNBC                                    | HCC1143   | TNBC                                    |
| MDA-MB-231 | TNBC                                    | HTB26     | TNBC                                    |
| MDA-MB-468 | TNBC                                    | HCC1954   | HER2+                                   |
| SUM149     | TNBC                                    | SKBR3     | HER2+                                   |
| HCC1599    | TNBC                                    | HDQ-P1    | TNBC                                    |
| HCC1806    | TNBC                                    | T47D      | ER+                                     |
| BT20       | TNBC                                    | CAL51     | TNBC                                    |

## (B) EGFR protein expression by FACS

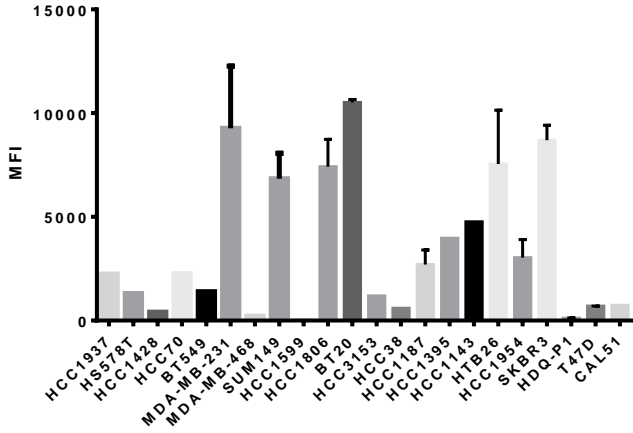

## (C) HER2 protein expression by FACS

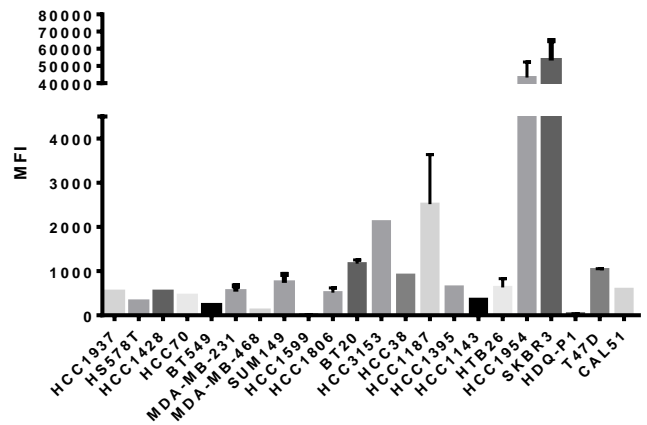

## (D) siRNA knockdown - FRα expression

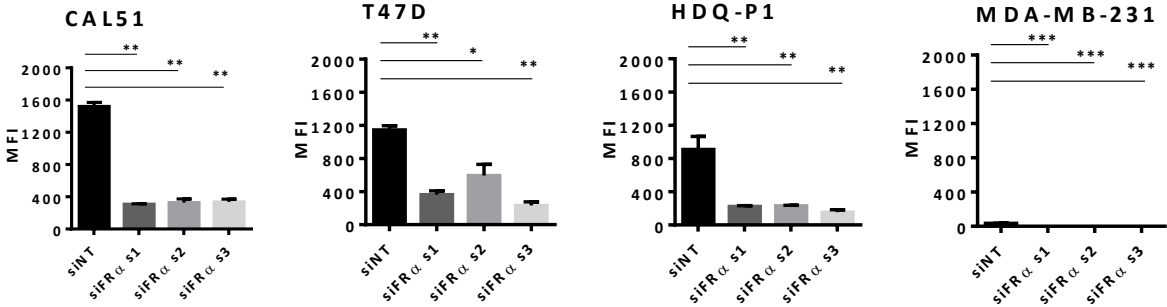

## (E) Cancer cell viability after reduction of FRα

|               | % cell viability ± S.E.M. compared with scrambled siRNA-treated cells (N=3) |        |         |        |        |         |        |        |         |
|---------------|-----------------------------------------------------------------------------|--------|---------|--------|--------|---------|--------|--------|---------|
|               | siFRα1                                                                      | S.E.M. | P value | siFRα2 | S.E.M. | P value | siFRα3 | S.E.M. | P value |
| <b>CAL51</b>  | 67.8                                                                        | 3.3    | 0.0005  | 75.6   | 4.0    | 0.0005  | 80.1   | 2.0    | 0.0005  |
| <b>T47D</b>   | 74.3                                                                        | 3.2    | 0.0005  | 74.2   | 4.4    | 0.0005  | 74.2   | 3.1    | 0.0005  |
| <b>HDQ-P1</b> | 85.9                                                                        | 3.3    | 0.0005  | 41.1   | 3.1    | 0.0005  | 31.5   | 2.4    | 0.0005  |

## (F) Colony formation after reduction of FRα

|               | % surviving colony formation ± S.E.M. compared with scrambled siRNA-treated cells (N=3) |        |         |        |        |         |        |        |         |
|---------------|-----------------------------------------------------------------------------------------|--------|---------|--------|--------|---------|--------|--------|---------|
|               | siFRα1                                                                                  | S.E.M. | P value | siFRα2 | S.E.M. | P value | siFRα3 | S.E.M. | P value |
| <b>CAL51</b>  | 61.7                                                                                    | 3.1    | 0.0005  | 74.7   | 2.9    | 0.0005  | 73.3   | 2.1    | 0.0005  |
| <b>T47D</b>   | 71.6                                                                                    | 2.7    | 0.0005  | 78.1   | 4.0    | 0.0005  | 82.0   | 3.0    | 0.0005  |
| <b>HDQ-P1</b> | 88.6                                                                                    | 7.6    | n/s     | 29.1   | 2.5    | 0.0005  | 56.0   | 6.1    | 0.005   |

# Supplementary figure 3

## (A) shRNA knockdown in CAL51 cells

5' **AgeI**- FR $\alpha$  target sequence - shRNA loop- FR $\alpha$  target sequence (rev. comp.) - terminator -**EcoRI** 3'

5' **CCGGTGGATGTTTCCTACCTATATAGATTCAGTGAAGCCACAGATGTGAATCTATATAGGTAGGAAACATCCTTTTTG** 3'

3' **ACCTACAAAGGATGGATATATCTAAGTCACTTCGGGTCTAGACTTAGATATATCCATCCTTTGTAGGAAAAA**CTTAA 5'

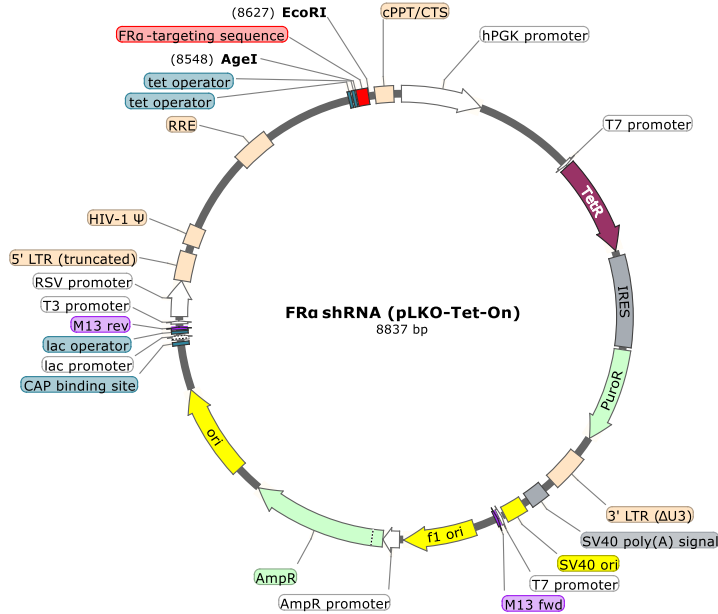

## (B) Human Phospho-Kinase Array reference points

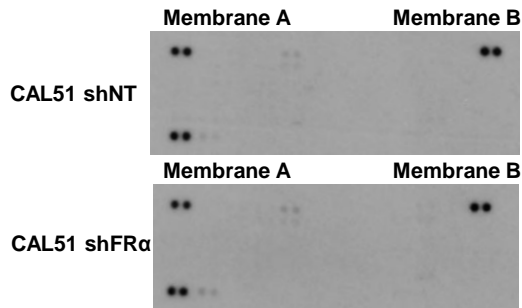

## (C) Src kinase inhibitor AZM475271

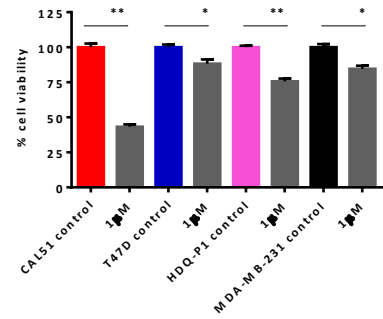

## (D) Inhibitory effect of MOv18 on cell proliferation in medium acutely depleted of folate

|                                    |             |
|------------------------------------|-------------|
| Physiological folate concentration | 20 nM       |
| DMEM folate concentration          | 9.2 $\mu$ M |
| FBS folate concentration           | 4 nM        |
| Folate-depleted DMEM with 10% FCS  | 0.4 nM      |

### Normal media

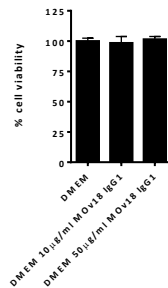

### Folate- depleted media

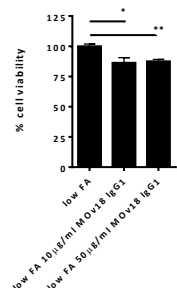

# Supplementary figure 4

## (A) Fc receptor expression profile and binding of IgG1 (B) Calculation of % tumor cell killing

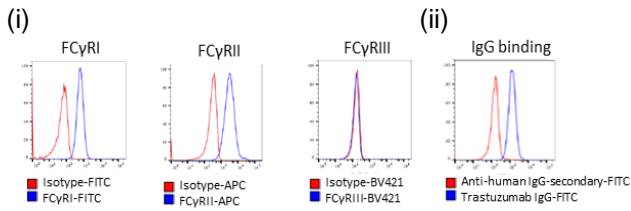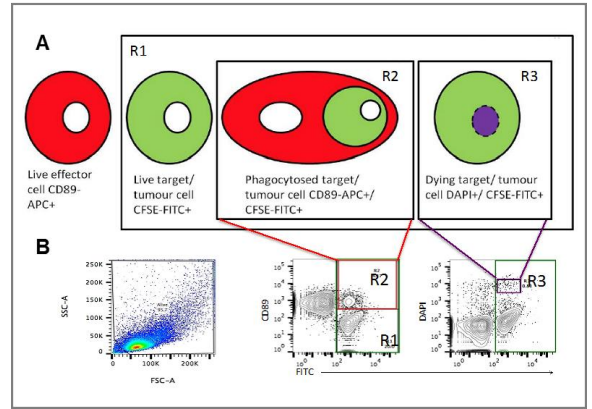

## (C) % tumor cell death with U937 human monocytes as effector cells (refers to data from Figure 5B)

|            | MOv18 IgG1 |        |      |        | Isotype IgG1 |        |      |        | P value | No antibody |        |      |        | P value |
|------------|------------|--------|------|--------|--------------|--------|------|--------|---------|-------------|--------|------|--------|---------|
|            | ADCC       | S.E.M. | ADCP | S.E.M. | ADCC         | S.E.M. | ADCP | S.E.M. |         | ADCC        | S.E.M. | ADCP | S.E.M. |         |
| CAL51      | 20.5       | 7.8    | 13.2 | 3.3    | 9.1          | 2.7    | 3.6  | 0.8    | 0.05    | 11.3        | 3.0    | 3.5  | 0.5    | 0.05    |
| T47D       | 8.5        | 6.7    | 23.0 | 7.0    | 3.9          | 1.7    | 11.1 | 4.7    | 0.05    | 3.7         | 0.8    | 10.3 | 2.3    | 0.05    |
| HDQ-P1     | 14.6       | 4.7    | 29.2 | 8.8    | 9.3          | 4.1    | 14.7 | 6.9    | 0.0005  | 12.2        | 4.0    | 7.2  | 0.4    | 0.0005  |
| SKBR3      | 2.2        | 0.9    | 7.7  | 0.6    | 3.7          | 3.3    | 5.9  | 1.2    | n/s     | 4.8         | 2.6    | 5.9  | 0.4    | n/s     |
| MDA-MB-231 | 7.1        | 3.2    | 17.6 | 2.3    | 4.7          | 2.7    | 14.8 | 0.4    | n/s     | 9.9         | 2.9    | 13.2 | 0.9    | n/s     |
| HCC1428    | 4.4        | 0.7    | 9.7  | 1.8    | 11.3         | 2.2    | 5.5  | 0.5    | n/s     | 6.5         | 3.2    | 6.1  | 0.9    | n/s     |

## (D) Patient characteristics (refers to data from Figure 5C)

| Patient | Type | Age | Grade | Stage | Metastatic disease | Chemotherapy |
|---------|------|-----|-------|-------|--------------------|--------------|
| 1       | TNBC | 43  | 2     | n/a   | Yes                | Yes          |
| 2       | TNBC | 44  | 3     | 2     | No                 | Yes          |
| 3       | TNBC | 61  | 3     | n/a   | Yes                | Yes          |
| 4       | TNBC | 31  | 3     | n/a   | Yes                | No           |
| 5       | TNBC | 28  | 3     | 2     | No                 | Yes          |
| 6       | TNBC | 47  | 3     | 2     | Yes                | Yes          |
| 7       | TNBC | 59  | 3     | 2     | No                 | Yes          |
| 8       | TNBC | 51  | 3     | 4     | Yes                | Yes          |
| 9       | TNBC | 55  | n/a   | n/a   | Yes                | Yes          |

## (E) % tumor cell death with healthy volunteers' PBMC as effector cells (refers to data from Figure 5C)

|       | MOv18 IgG1 |        |      |        | Isotype IgG1 |        |      |        | P value | No antibody |        |      |        | P value |
|-------|------------|--------|------|--------|--------------|--------|------|--------|---------|-------------|--------|------|--------|---------|
|       | ADCC       | S.E.M. | ADCP | S.E.M. | ADCC         | S.E.M. | ADCP | S.E.M. |         | ADCC        | S.E.M. | ADCP | S.E.M. |         |
| CAL51 | 12.9       | 6.0    | 19.4 | 6.8    | 10.6         | 4.6    | 8.1  | 4.1    | 0.005   | 10.4        | 3.4    | 8.1  | 4.0    | 0.005   |

## (F) % tumor cell death with TNBC patients' PBMC as effector cells (refers to data from Figure 5C)

|       | MOv18 IgG1 |        |      |        | Isotype IgG1 |        |      |        | P value | No antibody |        |      |        | P value |
|-------|------------|--------|------|--------|--------------|--------|------|--------|---------|-------------|--------|------|--------|---------|
|       | ADCC       | S.E.M. | ADCP | S.E.M. | ADCC         | S.E.M. | ADCP | S.E.M. |         | ADCC        | S.E.M. | ADCP | S.E.M. |         |
| CAL51 | 17.1       | 8.2    | 21.9 | 11.2   | 11.7         | 3.0    | 7.0  | 3.6    | 0.005   | 12.5        | 3.8    | 5.7  | 2.6    | 0.005   |

# Supplementary figure 5

## (A) Phenotyping of engrafted immune cells

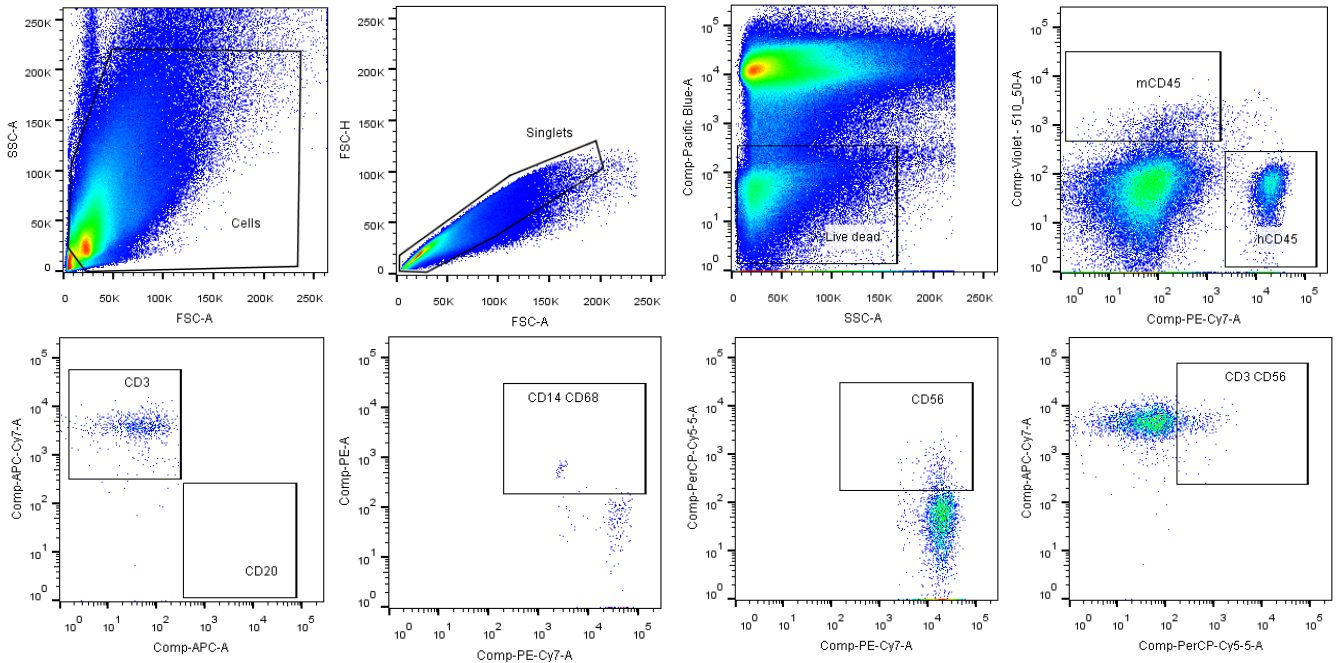

## (B) Antibody panel

| Reagent         | Colour      |
|-----------------|-------------|
| Anti-mouse CD45 | V500        |
| Anti-human CD45 | PE-Cy7      |
| Anti-human CD20 | APC         |
| Anti-human CD3  | APC-Cy7     |
| Anti-human CD14 | PE          |
| Anti-human CD68 | PE          |
| Anti-human CD56 | PerCP-Cy5.5 |
| Dead cell       | DAPI        |

  

| Marker                | Cell type    |
|-----------------------|--------------|
| CD45                  | Immune cells |
| CD3                   | T cells      |
| CD20                  | B cells      |
| CD14 CD68             | Macrophages  |
| CD3 <sup>-</sup> CD56 | NK cells     |
| CD3 <sup>+</sup> CD56 | NK T cells   |

## (C)

### WHIM02 CD45<sup>+</sup> FACS staining in tumor tissue

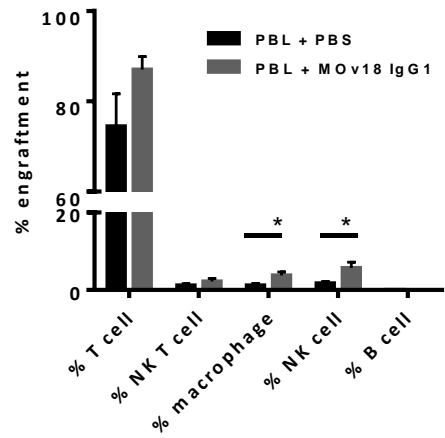

# Supplementary Table 1

## King's College London TMA

| Sample type             | Number of sample | FR $\alpha$ positive sample | Positive [%] |
|-------------------------|------------------|-----------------------------|--------------|
| <b>Grade</b>            |                  |                             |              |
| Grade 1                 | 24               | 0                           | 0.0          |
| Grade 2                 | 78               | 6                           | 7.7          |
| Grade 3                 | 186<br>(288)     | 46                          | 24.7         |
| <b>Defined by IHC</b>   |                  |                             |              |
| TNBC                    | 76               | 28                          | 36.8         |
| ER negative             | 10               | 3                           | 30.0         |
| ER positive             | 67               | 5                           | 7.5          |
| HER2                    | 45               | 7                           | 15.6         |
| Luminal<br>(Total)      | 107<br>(305)     | 7                           | 6.5          |
| <b>Defined by PAM50</b> |                  |                             |              |
| Basal-like              | 72               | 24                          | 33.3         |
| HER2                    | 28               | 3                           | 10.7         |
| Luminal A               | 14               | 1                           | 7.1          |
| Luminal B               | 4                | 1                           | 25.0         |
| Normal-like<br>(Total)  | 7<br>(125)       | 2                           | 28.6         |
